# Supplementary material for: Localization of stuttering based on causal brain lesions
Source: PubMed Central journal article supplement — Brain. 2024 May 27;147(6):2203–13. doi: 10.1093/brain/awae059 (PMC11146419; doi:10.1093/brain/awae059), 2024-05-27
Supplement: awae059_supplementary_data.pdf [file awae059_supplementary_data.pdf]

**Supplementary Table 1. Overview of case reports with acquired neurogenic stuttering in the literature cohort**

| #  | Paper                | Age | Sex | Hand. | Location                                                | Side | Delay                | Other speech disorders        | Other symptoms                                     | Lesion type      |
|----|----------------------|-----|-----|-------|---------------------------------------------------------|------|----------------------|-------------------------------|----------------------------------------------------|------------------|
| 1  | Ardila 1986          | 50  | M   | R     | Temporal lobe                                           | R    | "After the recovery" | Speaking difficulty           | L hemiparesis                                      | Ischaemic stroke |
| 2  | Soroker 1990         | 65  | M   | R     | Internal capsula, putamen, periventricular white matter | R    | 2 weeks              | -                             | L hemiparesis                                      | Ischaemic stroke |
| 3  | Abe 1993             | 38  | M   | -     | Thalamus, midbrain                                      | Bil  | < 3 months           | -                             | Tetraparesis, apathy, gaze palsy                   | Ischaemic stroke |
| 4  | Grant 1999 Case 1    | 68  | M   | R     | Frontotemporoparietal region                            | L    | No delay             | Dysarthria                    | R hemiparesis                                      | Ischaemic stroke |
| 5  | Grant 1999 Case 4    | 55  | M   | R     | Occipital lobe                                          | L    | < 2 weeks            | -                             | R hemianopia                                       | Ischaemic stroke |
| 6  | Carluer 2000         | 58  | M   | R     | Striatum                                                | L    | Weeks                | Transient aphasia             | R hemiparesis and parkinsonism                     | Ischaemic stroke |
| 7  | Ciabarra 2000 Case 1 | 53  | M   | R     | Rostromedial pons                                       | L    | No delay             | Dysarthria                    | Vertigo, ataxia, L INO, L facial droop, jaw tremor | Ischaemic stroke |
| 8  | Ciabarra 2000 Case 2 | 54  | F   | R     | Putamen, caudate, corona radiata                        | L    | No delay             | Dysarthria                    | R facial droop, slowness of right finger movements | Ischaemic stroke |
| 9  | Ciabarra 2000 Case 3 | 63  | F   | L     | Corona radiata, putamen, subinsular                     | L    | No delay             | Difficulty finding words      | Reduced vision, R hemiparesis                      | Ischaemic stroke |
| 10 | Turgut 2002          | 61  | M   | R     | Parietal cortex                                         | L    | No delay             | -                             | R hemiparesis                                      | Ischaemic stroke |
| 11 | Doi 2003             | 60  | M   | -     | Midbrain, pons                                          | Bil  | No delay             | Dysarthria                    | Vertigo, ataxia, gaze palsy                        | Ischaemic stroke |
| 12 | Van Borsel 2003      | 38  | M   | R     | Thalamus                                                | L    | < 6 months           | Aphasia                       | R hemiparesis                                      | Ischaemic stroke |
| 13 | Kakishita 2004       | 51  | M   | R     | Corpus callosum                                         | R    | No delay             | -                             | -                                                  | Ischaemic stroke |
| 14 | Hamano 2005          | 77  | F   | R     | Corpus callosum                                         | Mid  | No delay             | -                             | Dizziness, nausea                                  | Ischaemic stroke |
| 15 | Sahin 2005 Case 1    | 65  | F   | R     | Parietal lobe                                           | L    | 2 days               | Transient disability to speak | R hemiparesis                                      | Ischaemic stroke |
| 16 | Osawa 2006           | 51  | M   | R     | Tempo-parieto-occipital                                 | L    | < 2 days             | Wernicke's aphasia            | Homonymous hemianopsia, apraxia                    | Ischaemic stroke |
| 17 | Karakis 2008         | 51  | F   | R     | Midbrain                                                | Mid  | 1 week               | Dysarthria                    | Gaze palsy, ataxia                                 | Ischaemic stroke |
| 18 | Tani 2011 Case 1     | 49  | M   | A     | Putamen                                                 | Bil  | days                 | Anomic aphasia, dysarthria    | R hemiparesis                                      | Haemorrhage      |
| 19 | Tani 2011 Case 2     | 16  | M   | R     | Putamen, globus pallidus                                | Bil  | 6 months             | Dysarthria                    | Ataxia                                             | Trauma           |
| 20 | Van Houtte 2014      | 28  | F   | R     | Temporal lobe                                           | L    | days                 | -                             | Transient linguistic disturbances                  | Haemorrhage      |

Lesion location is listed according to the description in the original case report.

A = ambidextrous, Bil = bilateral, F = female, Hand = Handedness, INO = internuclear ophthalmoplegia, L = left, M= male, Mid=Midline, R = right, - = Not reported.

**Supplementary Table 2. Demographics of the cases in the acquired and developmental stuttering datasets**

|                                                                               | <b>Neurogenic stuttering<br/>– literature cohort</b> | <b>Controls<br/>– literature cohort</b>                                   | <b>Neurogenic stuttering<br/>– clinical cohort</b> | <b>Controls<br/>– clinical cohort</b>     | <b>Developmental stuttering<br/>cohort</b>                     |
|-------------------------------------------------------------------------------|------------------------------------------------------|---------------------------------------------------------------------------|----------------------------------------------------|-------------------------------------------|----------------------------------------------------------------|
| N                                                                             | 20                                                   | 169                                                                       | 20                                                 | 17                                        | 20                                                             |
| Age<br>(median [range])                                                       | 53 [16-77]                                           | 69 [27-92]                                                                | 72 [45-87]                                         | 69 [50-83]                                | 53 [18-43]                                                     |
| Sex (M/F)                                                                     | 14/6                                                 | 105/64                                                                    | 13/7                                               | 11/6                                      | 14/6                                                           |
| Handedness                                                                    | 13R, 1A, 6L                                          | 106R, 6L <sup>1</sup>                                                     | 20R                                                | 17R, 3L                                   | 15R, 4A, 1L                                                    |
| Aetiology (n [%])                                                             | 17 [85%] infarcts,<br>3 [15%] haemorrhages           | 139 [87%] infarcts,<br>16 [10%] haemorrhages,<br>5 [3%] both <sup>2</sup> | 18 [90%] infarcts,<br>2 [10%] haemorrhages         | 15 [88%] infarcts,<br>1 [12%] haemorrhage | N/A                                                            |
| % stuttered disfluencies during<br>conversation (median [range]) <sup>3</sup> |                                                      |                                                                           | 4.5 [1.8-19.4] <sup>4</sup>                        | 1.5 [0.3-2.6]                             | 4.5 [0.9-35.2]                                                 |
| % stuttered disfluencies during<br>monologue (median [range])                 |                                                      |                                                                           | 4.4 [1.8-10.9] <sup>5</sup>                        | 1.0 [0.0-2.7]                             |                                                                |
| % stuttered disfluencies during<br>reading (median [range])                   |                                                      |                                                                           | 3.0 [0.0-13.0] <sup>6</sup>                        | 0.5 [0.0-2.3]                             |                                                                |
| OASES score (median [range])<br>Impact (median [range])                       |                                                      |                                                                           |                                                    |                                           | 2.5 [1.5-3.5]<br>moderate [mild/moderate –<br>moderate/severe] |
| Aphasia                                                                       | 4/11 (36%)                                           |                                                                           | 14/20 (70%)                                        | 10/15 <sup>4</sup> (67%)                  |                                                                |
| Anomia                                                                        | 1/11 (9%)                                            |                                                                           | 13/20 (65%)                                        | 9/17 (53%)                                |                                                                |
| Dysarthria                                                                    | 7/11 (64%)                                           |                                                                           | 9/20 (45%)                                         | 4/17 (24%)                                |                                                                |
| Apraxia of speech                                                             |                                                      |                                                                           | 5/20 (25%)                                         | 2/17 (12%)                                |                                                                |

<sup>1</sup>57 missing values

<sup>2</sup>9 missing values

<sup>3</sup>For the clinical cohort, interrater reliability was measured by rescoring of 25% of conversation samples (N = 10) by a trained second observer. The percentage of stuttered disfluencies was strongly correlated between the two raters ( $r_s=0.82$ ,  $P<0.01$ ).<sup>34</sup> For the developmental stuttering cohort, rescoring of 50% of conversation samples (N = 10) by a trained second speech therapist with expertise in stuttering showed a very strong correlation ( $r_s=0.99$ ,  $P<0.01$ ).

<sup>4</sup>The information from the clinical cohort has been published previously.<sup>34</sup> While the range of disfluencies across the various speech tasks may be broader, all participants were identified with acquired neurogenic stuttering if they presented with more than 3% stuttered disfluencies during at least one of the included speech tasks.

<sup>5</sup>7 missing values

<sup>6</sup>3 missing values

<sup>7</sup>2 missing values

R = right, A = ambidextrous, L = left, OASES = Overall Assessment of the Speaker's Experience of Stuttering<sup>35</sup>

**Supplementary Table 3. Clusters showing significant associations with lesions in the literature cohort**

| <b>Cluster Index</b>         | <b>Voxels (N)</b> | <b>P Value</b> | <b>COG X (mm)</b> | <b>COG Y (mm)</b> | <b>COG Z (mm)</b> | <b>COG region</b>          |
|------------------------------|-------------------|----------------|-------------------|-------------------|-------------------|----------------------------|
| <b>Positive Associations</b> |                   |                |                   |                   |                   |                            |
| 1                            | 790               | <.01           | -29               | 0.06              | -7.19             | L putamen                  |
| 2                            | 108               | 0.01           | 30.5              | -5.1              | -10.9             | R putamen                  |
| 3                            | 89                | 0.01           | -38.5             | 21.8              | 11.7              | L inferior frontal gyrus   |
| <b>Negative Associations</b> |                   |                |                   |                   |                   |                            |
| 1                            | 1223              | 0.02           | 27.4              | -75.1             | 43.6              | R lateral occipital cortex |
| 2                            | 332               | 0.04           | -23.5             | -75.9             | 47                | L lateral occipital cortex |
| 3                            | 21                | 0.05           | 57.7              | -59.6             | -16.2             | L Inferior temporal gyrus  |
| 4                            | 14                | 0.03           | 35                | -49               | 67.9              | R superior parietal lobule |

COG = centre of gravity, L = left, R = right

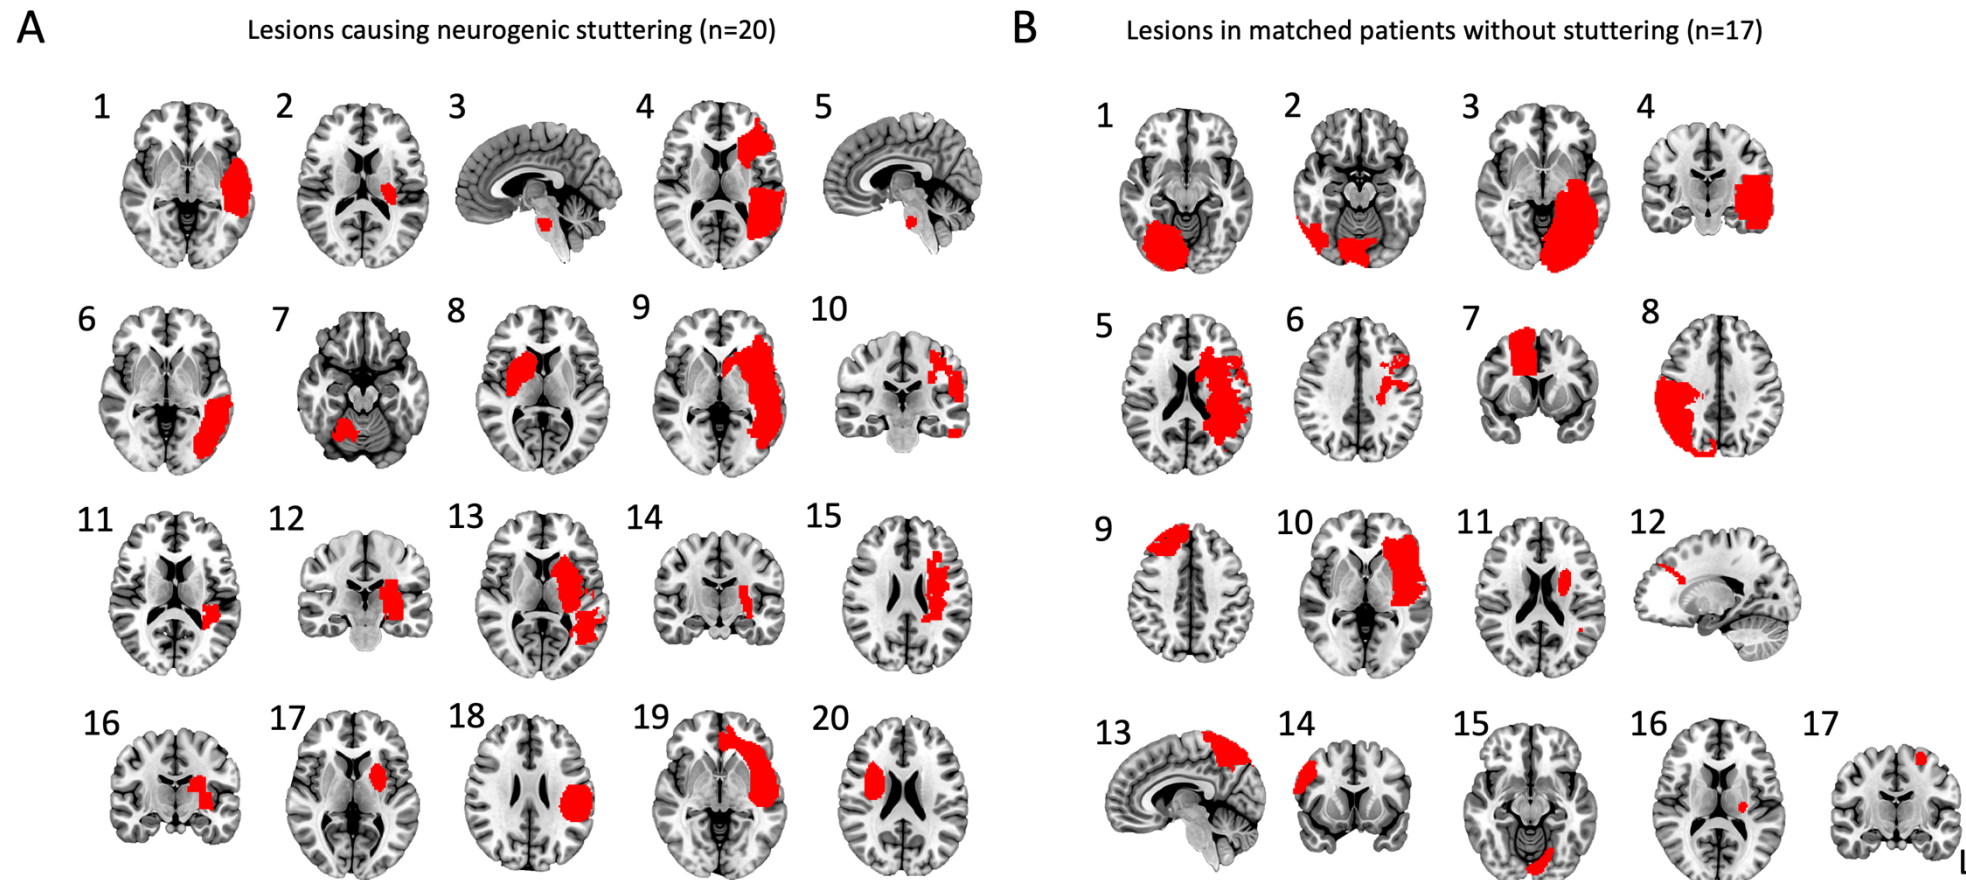

**Supplementary Fig. 1 Lesion maps of the clinical cohort. (A)** Lesions causing acquired neurogenic stuttering (N = 20), **(B)** Lesions of the control group matched for occurrence of speech-language problems following stroke (N = 17). See Supplementary Table 2 for additional information.

**Supplementary Table 4. Clusters showing significant associations with lesions in the clinical cohort**

| Cluster Index                | Voxels (N) | P Value | COG X (mm) | COG Y (mm) | COG Z (mm) | COG region                                       |
|------------------------------|------------|---------|------------|------------|------------|--------------------------------------------------|
| <b>Positive Associations</b> |            |         |            |            |            |                                                  |
| 1                            | 1247       | 0.02    | -31.3      | -7.17      | -6.51      | L putamen                                        |
| 2                            | 114        | 0.03    | 31.9       | -0.69      | -15.6      | R amygdala                                       |
| 3                            | 90         | 0.02    | -6.4       | -19.5      | -36.6      | L brainstem                                      |
| 4                            | 69         | 0.04    | 39.7       | -22.9      | 2.95       | R Heschl's gyrus                                 |
| 5                            | 53         | 0.01    | -26.4      | -1.24      | -36.9      | L parahippocampal gyrus/temporal fusiform cortex |
| 6                            | 32         | 0.03    | -11.4      | -21.5      | -1.45      | L thalamus                                       |
| 7                            | 15         | 0.04    | -14        | -58.8      | -24        | L cerebellum                                     |

COG = centre of gravity, L = left, R = right

**Supplementary Table 5. Common acquired stuttering hub, with clusters representing overlap of specificity data across the literature and clinical cohorts**

| <b>Cluster Index</b> | <b>Voxels (N)</b> | <b>P Value</b> | <b>COG X (mm)</b> | <b>COG Y (mm)</b> | <b>COG Z (mm)</b> | <b>COG region</b> |
|----------------------|-------------------|----------------|-------------------|-------------------|-------------------|-------------------|
| <b>1</b>             | 405               | <0.01          | -30               | -5.15             | -7.78             | L putamen         |
| <b>2</b>             | 22                | <0.01          | 28.2              | -4.18             | -11.9             | R amygdala        |

COG = centre of gravity, L = left, R = right

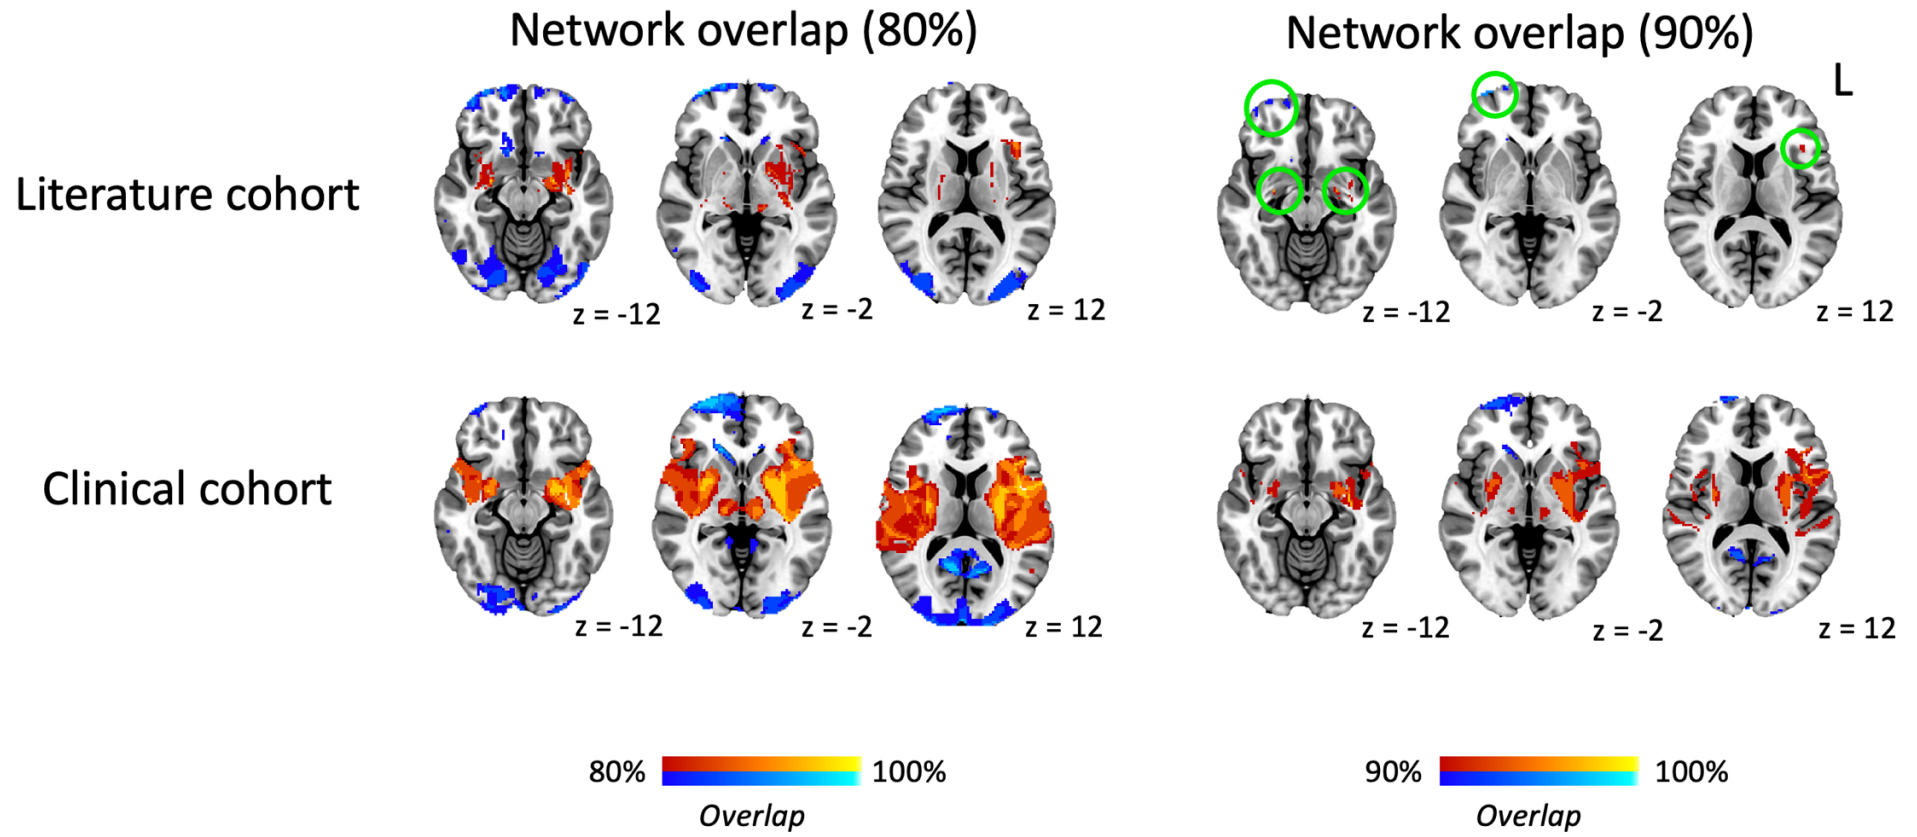

**Supplementary Fig. 2 Lesion network overlap at different thresholds.** Lesion network maps of the 20 cases were overlaid for each cohort, and thresholded at  $\geq 80\%$  overlap (left) and  $\geq 90\%$  overlap (right) to show regions connected to most of the lesion locations (i.e., regions sensitive to stuttering in the literature and clinical cohorts). Green circles used to highlight small clusters.

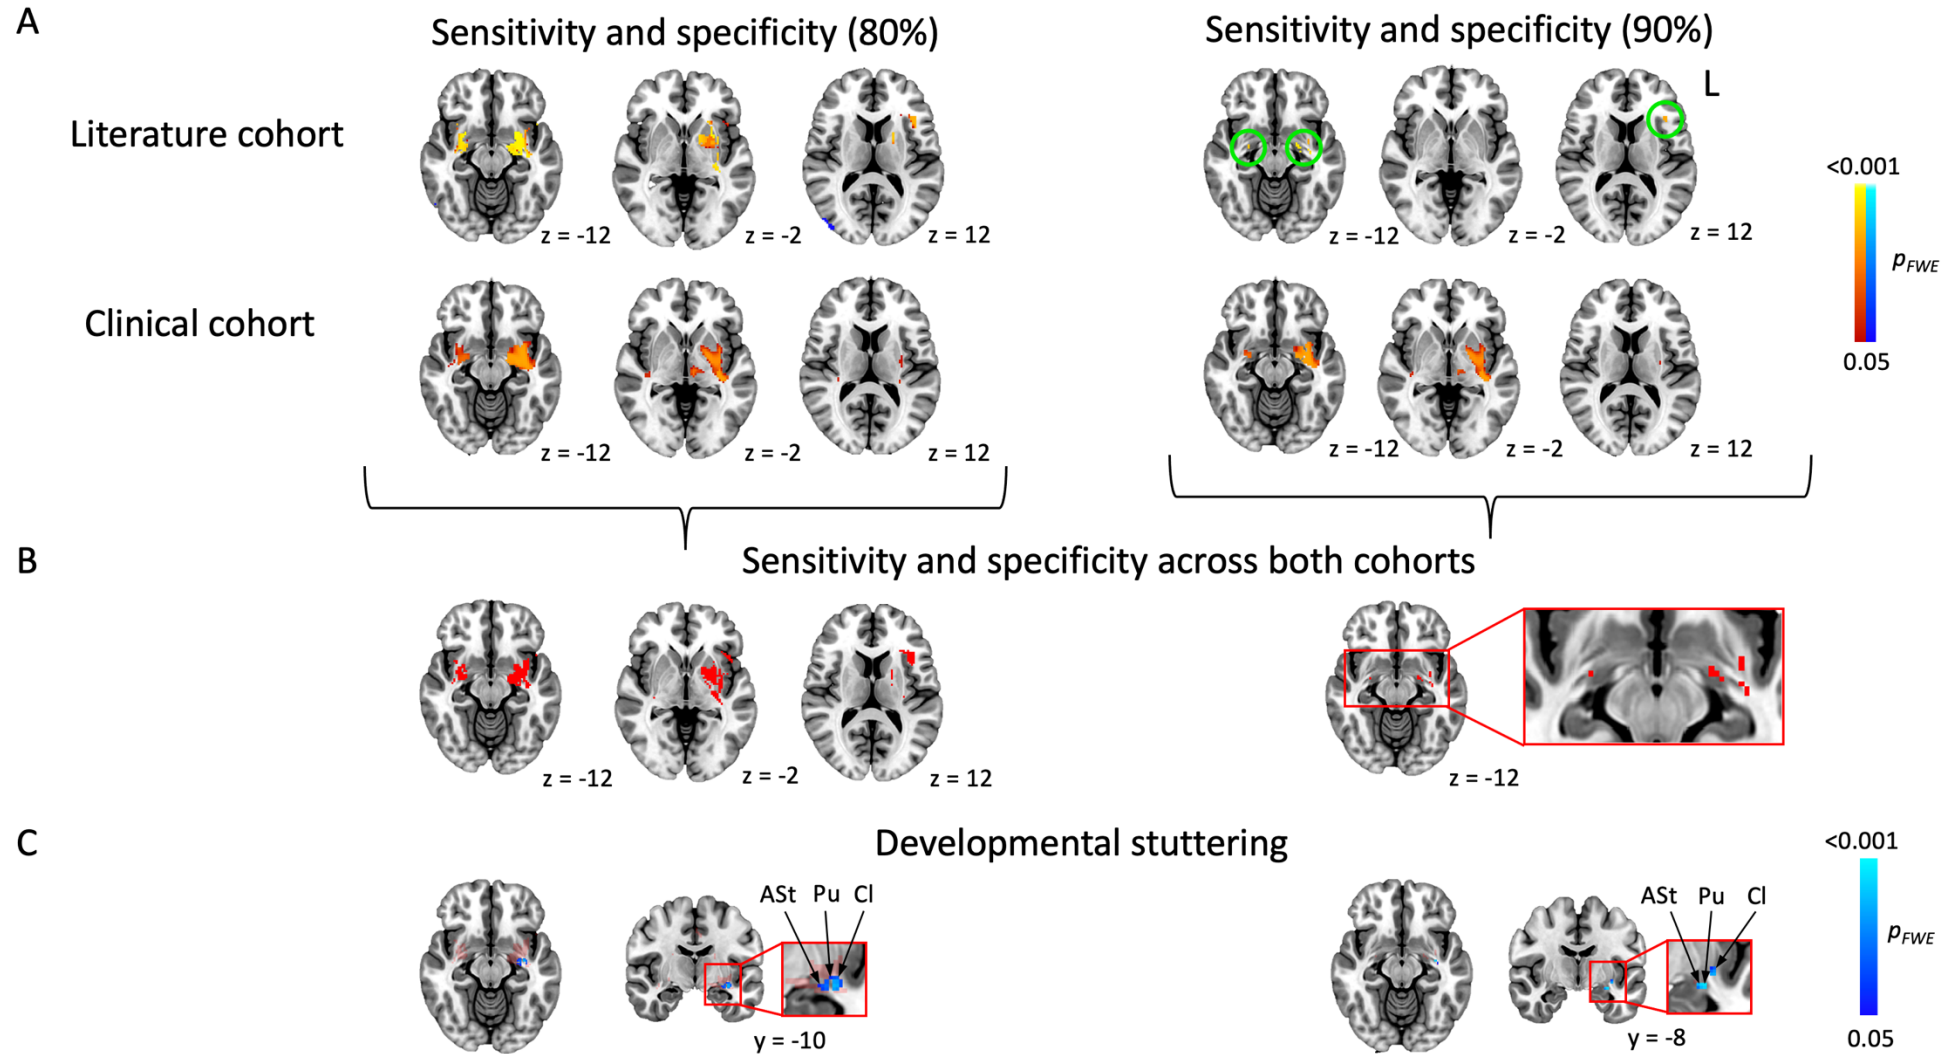

**Supplementary Fig. 3 Confirmatory analyses with different lesion network overlap thresholds (80% on left, 90% on right).** (A) Specificity analyses in the literature and clinical cohorts (whole brain  $P_{FWE} < 0.05$ ), followed by conjunction analyses using the 80% or 90% threshold for both groups (see Supplementary Fig. 2) to show areas both sensitive and specific for stuttering in each of the cohorts. Positive associations are shown in red-yellow, negative in blue-light blue. Green circles used to highlight small clusters. (B) Common acquired stuttering networks using the 80% (left) or 90% (right) threshold, showing common areas that were sensitive and specific across both neurogenic stuttering cohorts. (C) Regression analyses within the identified common acquired neurogenic stuttering networks (from B, shown as transparent red in C) showed that more negative experiences with stuttering (OASES scores) were associated with increased grey matter volume in participants with persistent developmental stuttering ( $P_{FWE} < 0.05$ , shown in blue). ASt = amygdalostratial transition area; Cl = claustrum; Pu = putamen.
